# Supplementary material for: Low-symmetry vacancy-related spin qubit in hexagonal boron nitride
Source: Springer Nature journal article supplement (doi:10.1038/s41524-024-01361-z), 2024-08-15
Supplement: MOESM1 [file 41524_2024_1361_MOESM1_ESM.pdf]

# Supplementary Information for the paper

## Low-symmetry vacancy-related spin qubit in hexagonal boron nitride

Rohit Babar<sup>1,2,†</sup>, Gergely Barcza<sup>1,2,†</sup>, Anton Pershin<sup>1,3,†</sup>, Hyoju Park<sup>4</sup>, Oscar Balancea Lindvall<sup>5</sup>, Gergő Thiering<sup>1</sup>, Örs Legeza<sup>1,6</sup>, Jamie H. Warner,<sup>4</sup> Igor A. Abrikosov<sup>5</sup>, Adam Gali<sup>1,3,\*</sup>, and Viktor Ivády<sup>2,5,8,\*</sup>

<sup>1</sup>*HUN-REN Wigner Research Centre for Physics, PO Box 49, H-1525, Budapest, Hungary*

<sup>2</sup>*MTA–ELTE Lendület "Momentum" NewQubit Research Group, Pázmány Péter, Sétány 1/A, 1117 Budapest, Hungary*

<sup>3</sup>*Department of Atomic Physics, Institute of Physics, Budapest University of Technology and Economics, Műegyetem rakpart 3., H-1111, Budapest, Hungary*

<sup>4</sup>*Walker Department of Mechanical Engineering and Materials Graduate Program, Texas Materials Institute, The University of Texas at Austin, Austin, Texas 78712, United States*

<sup>5</sup>*Department of Physics, Chemistry and Biology, Linköping University, SE-581 83 Linköping, Sweden*

<sup>6</sup>*Institute for Advanced Study, Technical University of Munich, Lichtenbergstrasse 2a, 85748 Garching, Germany*

<sup>7</sup>*MTA-WFK Lendület "Momentum" Semiconductor Nanostructures Research Group, PO Box 49, H-1525, Budapest, Hungary*

<sup>8</sup>*Department of Physics of Complex Systems, Eötvös Loránd University, Egyetem tér 1-3, H-1053 Budapest, Hungary.*

<sup>†</sup>*Contributed equally.*

<sup>\*</sup>*email:gali.adam@wigner.hu; ivady.viktor@ttk.elte.hu*

July 2, 2024

26 **Contents**

|    |                                                                               |           |
|----|-------------------------------------------------------------------------------|-----------|
| 27 | <b>1 Supplementary Note 1 - Discussion on the methodology</b>                 | <b>3</b>  |
| 28 | <b>2 Supplementary Note 2 - Fabrication</b>                                   | <b>4</b>  |
| 29 | <b>3 Supplementary Note 3 - Electronic structure</b>                          | <b>7</b>  |
| 30 | <b>4 Supplementary Note 4 - Excited states and decay processes</b>            | <b>10</b> |
| 31 | <b>5 Supplementary Note 5 - Spin Hamiltonian of the VB2 defect</b>            | <b>24</b> |
| 32 | <b>6 Supplementary Note 6 - Strain dependence of the electronic structure</b> | <b>31</b> |

## 33 **1 Supplementary Note 1 - Discussion on the methodology**

34 In this study, we utilize three state-of-the-art first-principles computational methods to provide  
35 a reliable and highly accurate description of the electronic structure of the VB2 defect. Our  
36 workhorse is the self-consistent hybrid density functional theory (DFT) with a modified HSE06<sup>1,2</sup>  
37 exchange-correlation function using 0.32 mixing parameter<sup>3</sup>. Hereinafter, we refer to this method  
38 as HSE(0.32). HSE(0.32) provides convergent and accurate values for all the considered ground  
39 state properties as well as for excited state energies and geometries when the excited state wave-  
40 function can be approximated by a single Slater determinant. It is not guaranteed in general that the  
41 last requirement is fulfilled for all the excited states, thus higher-level wavefunction-based meth-  
42 ods are needed to support the DFT calculations. Here we note that the most relevant low-energy  
43 excited states of the VB2 defect are found to be single Slater determinant, thus we can use the  
44 HSE(0.32) method to study them as well.

45 Second, we use n-electron valence state perturbation theory (NEVPT) to study the excited  
46 state spectrum. This method first describes the defect state on CASSCF level of theory and then,  
47 accounts for the dynamic correlation with the orbital outside the active space by the second-order  
48 perturbation theory. The method yields a convergent and quantitatively accurate spectrum even for  
49 the higher-lying excited states. Due to the computational complexity, we use an 8 orbital 8 electron  
50 active space to describe the most relevant electronic transitions among the defect states. A clear  
51 advantage of this approach is that, besides the excitation energies, the transition properties between  
52 the correlated wavefunctions (CASSCF) are readily available in the applied computational code.

53 Lastly, we use the density matrix renormalization group (DMRG) method to study the excited  
54 state spectrum. This wave function method is particularly suitable to describe strongly correlated  
55 effects, where the corresponding Hamiltonian is constructed according to the complete active space  
56 protocol. In order to minimize the uncertainties due to the active space selection, we studied active  
57 space composed of 100 orbitals. We expect that all the relevant multiplets are found in our DMRG  
58 calculations. Comparison of the DMRG, NEVPT, and HSE(0.32) results helps us to define the  
59 most relevant orbitals and to obtain reliable and convergent results. For the low energy part of the  
60 spectrum, we obtain remarkable agreement between all the methods.

## 2 Supplementary Note 2 - Fabrication

### \* Details on the formation energy calculations

In a layered host material like hBN, vacancy complexes may be formed by vacancies in the same layer (in-plane complexes) as well as by vacancies in different adjacent layers (inter-plane complexes).<sup>4</sup> According to recent theoretical studies the binding energy of the latter is only 0.4 eV in the most favorable configuration.<sup>4</sup> Note that, annealing at moderate temperature could unbind such an inter-layer complex. An adjacent pair of in-plane boron vacancies results in a highly unstable configuration where the nitrogen atom between the two vacancies possesses two dangling bonds and binds only to a single boron atom, see Fig. 1a of the main text. This unstable configuration transforms into an energetically favorable isostoichiometric configuration that consists of an adjacent boron vacancy, a nitrogen vacancy, and a nitrogen anti-site ( $V_B V_N N_B$ ), see Fig. 1b and 1d of the main text, which is referred as VB2 configuration hereinafter. Due to the appearance of strong nitrogen-nitrogen bonds, the formation of the VB2 complex is highly favorable. Indeed, we obtain 5.14 eV binding energy for a pair of neutral boron vacancy in the relaxed structure on HSE(0.32) level of theory, in good agreement with a previous work<sup>4</sup>.

The formation energy curves of the VB2 and the  $V_B$  defects as a function of the Fermi energy are depicted in Fig. 1c of the main text. As one can see,  $V_B$  possesses three stable charge states in the band gap with charge transition levels at 1.96 eV and 4.60 eV. Note that these charge transition levels are similar but deviate by +0.48 eV and -0.3 eV from previous calculations<sup>3</sup>. We attribute these differences to the distinct computational details. We utilized a large supercell of 768 atoms in contrast to the 240-atom supercell used in the prior work<sup>3</sup>. Depending on the position of the Fermi level, the VB2 defect exhibits four stable charge states and three charge transition levels, (+1/0), (0/-1), and (-1/-2) at 1.78 eV, 3.61 eV, and 4.90 eV in the band gap of hBN, see Fig. 1c of the main text. Due to the large binding energy of the VB2 configuration, the formation energy of the mono-vacancy and the VB2 complex are comparable, especially in boron-poor conditions. For Fermi energies approaching the valence band maximum, the formation energy of the positively charged VB2 complex is below 10 eV, and approaching the formation energy of the neutral boron vacancy. This opens a possibility for a direct creation of VB2 defects in a high-temperature thermal

89 equilibrium growth process with p-type doping.

90 \* **Fabrication in few layer hBN**

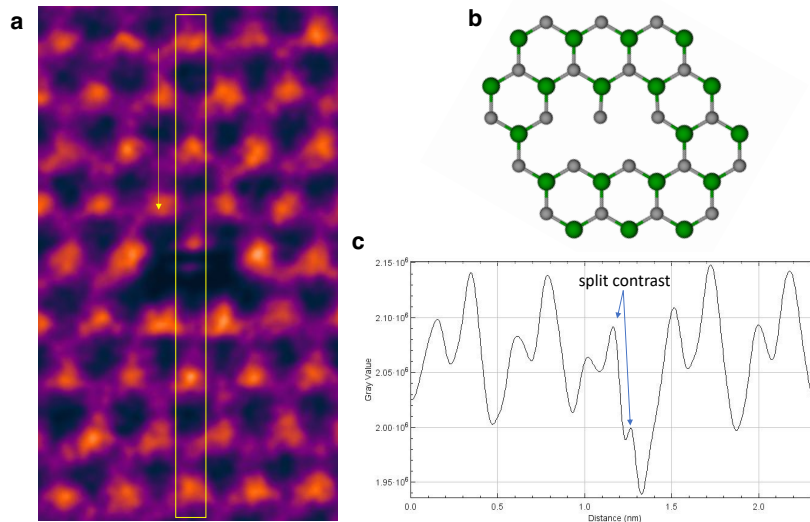

Supplemental Figure 1: **a** STEM image of the metastable boron divacancy configuration. **b** Structure of the boron divacancy configuration for comparison. **c** Intensity profile along the yellow box in **a**.

91 As we have discussed in the main text, the VB2 defect is readily observed in our STEM  
92 measurements in a single-layer hBN sample. In addition to the relaxed VB2 configuration, we  
93 also observe the metastable configuration of boron double vacancies in our STEM images, see  
94 Supplementary Figure 1a and b. As this defect configuration is short-lived, we anticipate that the  
95 divacancy defect is created by the electron beam of the STEM microscope when scanning through  
96 a single boron vacancy defect in the hBN sample. Indeed, the electron beam dominantly displaces  
97 boron atoms and creates boron vacancy-related defects. Furthermore, atoms close to defective sites  
98 are removed more frequently, thus the electron beam tends to create larger defect clusters.

99 The nitrogen atom between the two boron vacancies is unstable. As can be seen in Supple-  
100 mentary Figure 1c, the contrast of this atom is weak and split expectedly due to its movement. The  
101 unstable nitrogen atom may either relax into one of the vacancy sites and form the VB2 configu-  
102 ration or leave the defect due to the out-of-plane momentum received from the electron beam and

### BN divacancy

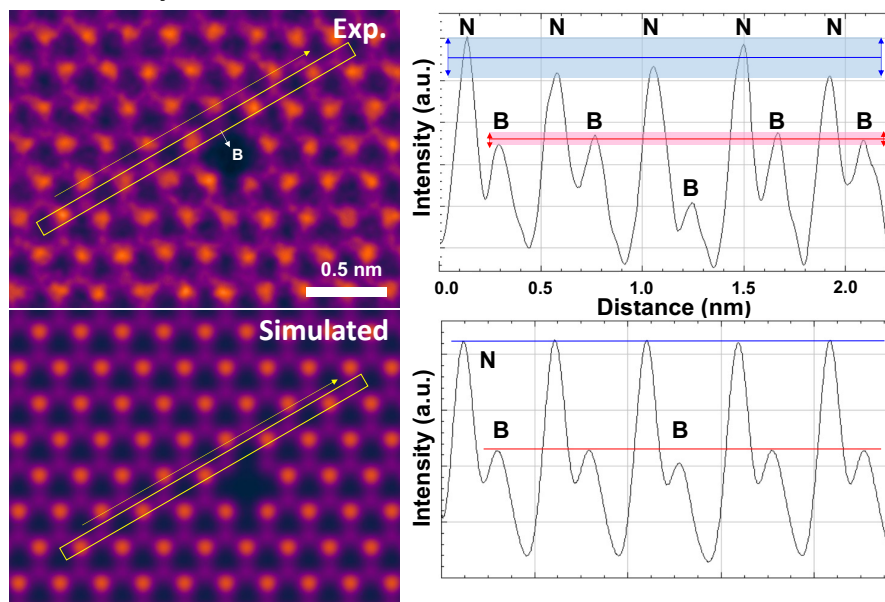

Supplemental Figure 2: STEM image and intensity profile of the boron-nitrogen divacancy configuration in hBN. The left top and left bottom panels show the experimental STEM image and corresponding simulation. The right panels depict the intensity profile along the yellow box.

103 give rise to a tri-vacancy configuration.

104 Supplementary Figure 2 shows the STEM image of the boron-nitrogen divacancy in hBN.  
105 Note that the boron atom at the edge has a darker contrast due to the low density of electrons.  
106 Compared to Fig. 1 of the main text, the differences between the STEM images of the VB2 and  
107 divacancy configurations are apparent.

108 These results show that the VB2 configuration may be intentionally created by a focused  
109 electron beam in a well-defined location. This fabrication mechanism may hold not only for a  
110 single layer but also for few-layer samples. The latter configuration is more favorable in applica-  
111 tions when the defect states need to be protected from environmental contaminants adsorbed on  
112 the surface of the sample.

113 \* **Fabrication in bulk**

114 Single boron vacancies are routinely created nowadays by after-growth processing, in par-  
115 ticular, by irradiation<sup>5-7</sup>, ion implantation<sup>6,8,9</sup>, and laser writing<sup>10</sup>. As the VB2 configuration is  
116 isostoichiometric to a boron vacancy pair, migration of boron vacancy may naturally form the  
117 VB2 configuration. Once the boron vacancies get close enough to each other, the 5.14 eV en-  
118 ergy release upon the formation of the VB2 configuration ensures the stability of the complex. To  
119 optimize such a boron vacancy migration-driven fabrication process, high irradiation doses may  
120 be desirable to ensure that the boron vacancy is the dominant defect and simultaneously pins the  
121 Fermi level within the band gap. When neutral boron vacancies are present in the sample, their  
122 aggregation is not hindered by the Coulombic repulsion. The high vacancy concentration may also  
123 be advantageous for the formation of vacancy complexes.

124 According to recent theoretical studies<sup>3</sup>, interstitial boron and nitrogen atoms are mobile even  
125 at room temperature, while the neutral boron and nitrogen vacancies are mobilized only at 1000 K  
126 and 1800 K, respectively. Therefore, annealing a highly irradiated hBN sample at 1000 K may lead  
127 to the formation of the VB2 configuration. We note, however, that the creation of larger vacancy  
128 complexes may also take place, thus the annealing temperature and time should be optimized.

### 129 **3 Supplementary Note 3 - Electronic structure**

#### 130 **\* Single particle electronic structure**

131 The single particle energy levels of the neutral VB2 defect as obtained from HSE(0.32)  
132 calculations are depicted in Supplementary Figure 3a. As can be seen, there are multiple occupied  
133 and unoccupied states appearing either inside or close to the band gap of hBN. To understand the  
134 electronic structure of the defect, we consider the four  $sp^2$  dangling bonds and the four  $p_z$  orbitals  
135 of the three nitrogen atoms and the boron atom neighboring the double vacancy site ( $V_B V_N$ ) of  
136 VB2. The eight defect states are occupied by 10 electrons in the neutral charge state. Note that  
137 due to the nitrogen-nitrogen bonds of the VB2 defect, other localized states are also formed that  
138 lie in the valence band and mix slightly with other orbitals. For simplicity, we ignore them in the  
139 discussion of the electronic structure and focus only on the dangling bonds and  $p_z$  orbitals of the  
140 four first nearest neighbor atoms.

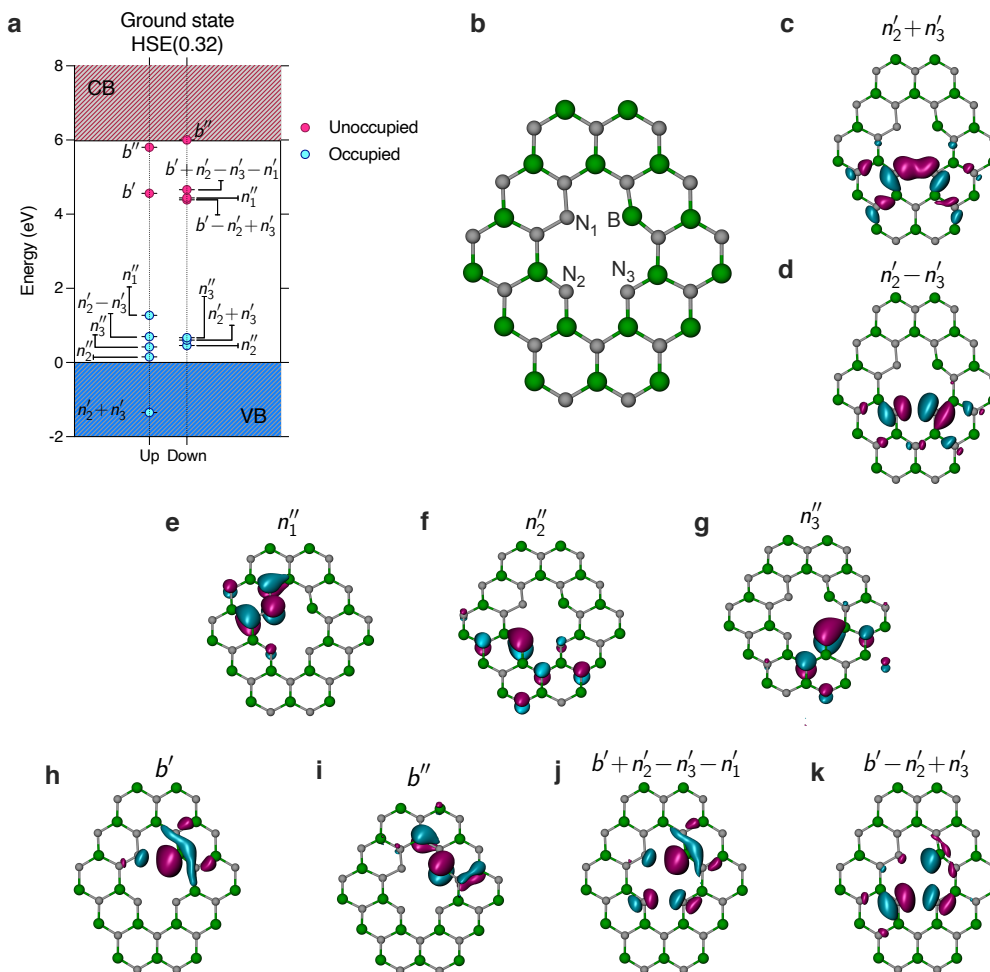

Supplemental Figure 3: Electronic structure and localized Kohn-Sham orbitals of the VB2 defect. **a** Single particle electronic structure of the triplet ground state as obtained by HSE(0.32) functional. Lines with colored points represent the most relevant defect states inside and close to the band gap of hBN. **b** Structure of VB2 with labels of the first neighbor atoms of the divacancy site. **c-k** Wavefunctions of defect states labelled in **a**.

141 The highest possible point group symmetry of the stable VB2 configuration is  $C_{1h}$  that con-  
 142 tains only a single in-plane reflection operator beside the identity operator and possesses two one-  
 143 dimensional irreducible representations,  $A'$  and  $A''$ . Considering  $s$  and  $p$  atomic orbitals of the host  
 144 material, only the  $p_z$  orbital transforms according to  $A''$  in our coordinate system where the  $z$  axis

145 is parallel to the  $c$ -axis.

146 Due to the low symmetry and complexity of the defect, irreducible representations alone are  
147 not sufficient to unambiguously label the defect states. Therefore, we use the lowercase labels of  
148 the first neighbor atoms,  $n_1$ ,  $n_2$ ,  $n_3$ , and  $b$ , see Supplementary Figure 3b, on which the states are  
149 dominantly localized, and prime and double prime superscripts of the irreducible representation  
150 of the states. For example,  $n_1''$  refers to an orbital that dominantly localized on atom  $N_1$  and  
151 transforms according to  $A''$  irreducible representation. When an orbital is localized on more than  
152 one first neighbor atoms, linear combinations of the site-dependent notations label the orbitals,  
153 e.g.  $n_2' \pm n_3'$  refers to an in-plane bonding and anti-bonding states between nitrogen  $N_1$  and  $N_2$ ,  
154 respectively. This combined notation enables us to unambiguously label the most relevant states in  
155 and close to the band gap.

156 Each of the defect energy levels depicted in Supplementary Figure 3a is labeled after analyz-  
157 ing the corresponding single-particle wavefunctions, depicted in Supplementary Figure 3c-k. The  
158 three states localized on the first neighbour nitrogen atoms with out-of-plane symmetry, i.e.  $n_1''$ ,  
159  $n_2''$ , and  $n_3''$ , are all found in the band gap in both spin channels. In the spin-up channel, they are  
160 all occupied and nearly degenerate, while in the spin-down channel only  $n_2''$  and  $n_3''$  are occupied  
161 and located close to the valence band edge with similar energy. Besides these states we find par-  
162 tially occupied bonding and anti-bonding combinations of the in-plane dangling bonds localized  
163 on  $N_2$  and  $N_3$  atoms, i.e.  $n_2' \pm n_3'$ . In the spin-up channel, both the bonding and the anti-bonding  
164 states are occupied with the latter being higher in energy, while in the spin-down channel, only the  
165 bonding state is occupied. The unoccupied states in the spin-up channel are formed by the in-plane  
166 and perpendicular-to-plane symmetric states of the first neighbor boron atom. In the spin-down  
167 channel, two additional unoccupied states appear,  $n_1''$  and the anti-bonding  $n_2' - n_3'$  that heavily  
168 mix with the  $b'$  state.

169 As the defect orbitals of the VB2 center have the tendency to form nearly degenerate states  
170 in the band gap close to the valence band edge, a high-spin ground state may be formed. From the  
171 electronic structure and the single particle wavefunctions depicted in Supplementary Figure 3, one  
172 can identify that the  $n_1''$  and the  $n_2' - n_3'$  states are half occupied. Indeed, these orbitals account

173 dominantly for the spin density depicted in Fig. 3a of the main text.

#### 174 \* **Singlet-triplet gap in the GS manifold**

175 The two half-filled states, giving rise to the high-spin ground state, have different charac-  
176 ters and are localized on different atoms. This feature has an important effect on the electronic  
177 structure. As the exchange energy between the two states is marginal and the singlet-triplet wave-  
178 functions are nearly identical, the singlet-triplet gap is unprecedentedly small compared to existing  
179 point defect qubits. By carrying out open-shell singlet calculations with PBE and HSE(0.32) func-  
180 tionals, we find that the triplet ground state is favorable by only 4.3 meV and 3.3 meV, respectively.  
181 To further confirm our DFT results, we carry out NEVPT2 and multireference DMRG calculations  
182 on HSE(0.32) relaxed ground state VB2 configuration in a single sheet hBN model and obtain  
183 10 meV and 12 meV singlet triplet vertical gap. Here, we note that the closed-shell singlet state  
184 is highly unfavorable, i.e. it is 1.3 eV higher in energy than the triplet ground state on HSE(0.32)  
185 level of theory.

### 186 **4 Supplementary Note 4 - Excited states and decay processes**

#### 187 \* **Excited states**

188 Due to the numerous defect energy levels found in the band gap of hBN, one may expect  
189 several excited states below the ionization threshold with diverse decay routes that may result  
190 in photoluminescence as well as spin-selective non-radiate decay through inter-system crossings  
191 (ICSs) between the triplet and singlet manifolds. Such processes are indispensable for an applica-  
192 ble qubit, as they make optical spin initialization and readout possible.

193 The HSE(0.32), NEVPT2, and DMRG vertical spectra as obtained on the ground state atomic  
194 configurations are provided in Supplemental Table 1. For a recent study on the excitation properties  
195 of VB2 see also Ref. [11]. Note that the labeling of the states is defined based on their zero-phonon  
196 photoluminescence transition energies, therefore, the states in the vertical, absorption energy spec-  
197 trum do not appear in order. All computational approaches consistently predict nearly degenerate  
198 pairs of singlet and triplet states throughout the spectrum. In particular, besides the singlet-triplet

Supplemental Table 1: Vertical energy spectra on the HSE(0.32) ground state atomic configuration as obtained with our methods. Labeling of the many-body states follows the labeling introduced in Fig. 2a of the main text. All values are in eV.

| state | transition                            | HSE(0.32) | NEVPT2 | DMRG  |
|-------|---------------------------------------|-----------|--------|-------|
| T0@GS | GS                                    | 0.000     | 0.000  | 0.000 |
| S0@GS | –                                     | 0.003     | 0.010  | 0.012 |
| S2@GS | $n''_2 \rightarrow n'_2 - n'_3$       | 1.855     | 1.993  | 1.603 |
| T2@GS | $n''_2 \rightarrow n'_2 - n'_3$       | 1.970     | 2.140  | 1.672 |
| T1@GS | $n''_1 \rightarrow b'$                | 2.343     | 2.279  | 4.243 |
| S1@GS | $n''_1 \rightarrow b'$                | 2.362     | 2.277  | 4.283 |
| S3@GS | $n''_3 \rightarrow n'_2 - n'_3$       | 2.4154    |        | 3.072 |
| T3@GS | $n''_3 \rightarrow n'_2 - n'_3$       | 2.417     | 2.541  | 3.070 |
| T4@GS | $n'_2 + n'_3 \rightarrow n'_2 - n'_3$ |           |        | 3.601 |
| S4@GS | $n'_2 + n'_3 \rightarrow n'_2 - n'_3$ |           |        | 3.620 |

199 pair in the ground state, we observe four additional pairs with excited state energies below the ion-  
200 ization threshold for the ground state configuration. We note that the excited state wavefunction  
201 obtained by NEVPT2 and DMRG methods can be well-characterized by a single Slater determi-  
202 nant. This observation enables us to use a less-demanding self-consistent field theory, such as the  
203 constrained occupation DFT method<sup>12</sup>, to study the excited state properties and carry out structural  
204 relaxation. Furthermore, as the ground state and all the excited states are dominantly single deter-  
205 minants, the latter can be characterized by a single electronic transition between the occupied and  
206 unoccupied orbitals of the ground state, see Supplemental Table 1.

207 As can be seen in Supplemental Table 1, we achieve remarkable quantitative agreement  
208 between the HSE(0.32) and NEVPT energy spectra that further support the use of the HSE(0.32)  
209 method for studying the VB2 center. The DMRG results agree well with the other method in the  
210 energy of the first optically excited triplet T2 and singlet S2 states. The energy of the T1 and  
211 S1 excited states is overestimated in DMRG compared to the NEVPT values. We attribute this  
212 difference to the lack of a sufficiently large number of unoccupied orbitals in the active space.  
213 The inclusion of higher-lying virtual states is expected to improve the description of the  $b'$  and  $b''$   
214 related multiplets. Note that the DMRG calculation finds other high-energy excited states, T4 and  
215 S4. As we will see later, this high-energy state does not play a role in the low-energy excitation  
216 processes.

217 The reason behind the appearance of singlet-triplet pairs throughout the spectrum is similar  
218 to what we have earlier seen for the S0 excited and the T0 ground states, i.e. the half-filled de-  
219 fect orbitals are localized on opposite sides of the defect that results in unusually small exchange  
220 energy in the triplet state. The observed excited triplets exhibit a similar feature, as the dominant  
221 transitions involve only such orbitals that localized either on the N<sub>2</sub> and N<sub>3</sub> atoms or on the N<sub>1</sub>  
222 and B atoms, see Supplemental Table 1. Therefore, the separation and overlap of the unpaired  
223 electrons are unaffected by these excitation processes. Note also that the relaxed geometries of  
224 the triplet and singlet states are nearly identical. Therefore, hereinafter we calculate the energy  
225 spectrum only on the triplet excited state geometries.

226 In order to analyze possible decay pathways, we calculate the vertical energy spectrum ob-

Supplemental Table 2: Vertical energy spectra as obtained on different HSE(0.32) relaxed excited state geometries. The energy of the ground state electronic configuration on the excited state configurations is set as the zero value of the energy scale. All values are in eV.

| configuration | state | transition                                 | HSE(0.32) | NEVPT2 | DMRG   |
|---------------|-------|--------------------------------------------|-----------|--------|--------|
| T1            | T1    | $n_1'' \rightarrow b'$                     | -0.225    |        | -0.155 |
|               | S1    | $n_1'' \rightarrow b'$                     |           |        | -0.095 |
|               | T0    | GS                                         | 0.000     | 0.000  | 0.000  |
|               | S0    | -                                          |           |        | 0.004  |
|               | Tm    | $n_3'', n_1'' \rightarrow n_2' - n_3', b'$ |           |        | 1.269  |
|               | Sm    | $n_3'', n_1'' \rightarrow n_2' - n_3', b'$ |           |        | 1.295  |
|               | Tn    | $n_3'', n_2'' \rightarrow n_2' - n_3'$     |           |        | 1.818  |
|               | Sn    | $n_3'', n_2'' \rightarrow n_2' - n_3'$     |           |        | 1.862  |
| T2            | T0    | GS                                         | 0.000     | 0.000  | 0.000  |
|               | S0    | -                                          |           | 0.011  | 0.015  |
|               | T2    | $n_2'' \rightarrow n_2' - n_3'$            | 1.248     | 1.321  | 0.900  |
|               | S2    | $n_2'' \rightarrow n_2' - n_3'$            | 1.330     | 1.206  | 0.858  |
|               | S3    | $n_3'' \rightarrow n_2' - n_3'$            |           | 2.239  | 3.752  |
|               | T3    | $n_3'' \rightarrow n_2' - n_3'$            |           | 2.248  | 3.748  |
|               | T4    | $n_2' + n_3' \rightarrow n_2' - n_3'$      |           |        | 3.880  |
|               | S4    | $n_2' + n_3' \rightarrow n_2' - n_3'$      |           |        | 3.906  |
|               | S1    | $n_1'' \rightarrow b'$                     |           | 3.648  | 4.514  |
|               | T1    | $n_1'' \rightarrow b'$                     |           | 3.653  | 4.230  |
| T3            | T0    | GS                                         | 0.000     | 0.000  | 0.000  |
|               | S0    | -                                          | -0.002    | 0.003  | 0.005  |
|               | S3    | $n_3'' \rightarrow n_2' - n_3'$            | 1.423     | 1.840  | 1.297  |
|               | T3    | $n_3'' \rightarrow n_2' - n_3'$            | 1.428     | 1.840  | 1.291  |
|               | S2    | $n_2'' \rightarrow n_2' - n_3'$            |           | 2.119  | 2.081  |
|               | T2    | $n_2'' \rightarrow n_2' - n_3'$            |           | 2.349  | 2.267  |
|               | T4    | $n_2' + n_3' \rightarrow n_2' - n_3'$      |           |        | 2.679  |
|               | S4    | $n_2' + n_3' \rightarrow n_2' - n_3'$      |           |        | 2.712  |
|               | T1    | $n_1'' \rightarrow b'$                     |           | 3.814  | 3.423  |
|               | S1    | $n_1'' \rightarrow b'$                     |           | 3.826  | 3.529  |

Supplemental Table 3: Mean absolute error (MAE) and mean absolute percentage error (MAPE) of the first optically excited state energies obtained on four different atomic configurations (GS, T1, T2, and T3) with different computational methods.

| methods         | MAE (eV) | MAPE (%) |
|-----------------|----------|----------|
| HSE(0.32)-NEVPT | 0.222    | 13.6     |
| HSE(0.32)-DMRG  | 0.234    | 23.2     |
| NEVPT-DMRG      | 0.453    | 31.2     |

227 tained on HSE(0.32) relaxed geometries of the T1, T2, and T3 excited states in Supplemental  
 228 Table 2. As can be seen for the T1 and T2 configurations, the first optical excited state is always  
 229 the corresponding excited state, i.e. on the T2(T3) HSE(0.32) geometry the T2(T3) and S2(S3)  
 230 excited states are the lowest energy optically excited states. Furthermore, the first excited energy  
 231 gaps are smaller than the absorption energies provided in Supplemental Table 1. This indicates  
 232 that the HSE(0.32) properly captures the nature of the many-body excited states.

233 The case of the T1 configuration needs further discussion. In the HSE(0.32) calculations we  
 234 observe a significant structural relaxation for the  $n_1'' \rightarrow b'$  transition that affects both T1 and S1  
 235 excited states. Due to the 1.34 eV relaxation energy of the T1 excited state and the 1.2 eV increase  
 236 of the energy of the ground state electronic configuration, the T1 and the ground state swap so  
 237 that T1 becomes the ground state on the corresponding atomic configuration and the ground state  
 238 occupation appears as the first excited state. Importantly, this huge relaxation effect is confirmed  
 239 by the DMRG calculations where the two states are also swapped. We note that the higher-lying  
 240 excited states on the T1 geometry have a multi-determinant character in contrast to the trend seen  
 241 for other geometries. In the NEVPT calculations on the T1 configuration, we cannot find a suitable  
 242 active space to accurately describe the spectrum.

243 While Supplemental Table 1 and Supplemental Table 2 provide the full spectrum on all the  
 244 geometries, the most relevant values for the current study are the first excited state energies. The  
 245 mean absolute error (MAE) and the mean absolute percentage error (MAPE) of different methods

246 for the first optically excited state energy are provided in Supplemental Table 3. As can be seen, a  
 247 low margin of error is achieved for the lowest energy excited states despite the different models and  
 248 computational methods used. Since for single Slater determinant excited states the self-consistent  
 249 HSE(0.32) method provides the most convergent and most accurate results, hereinafter we use this  
 250 method if not stated otherwise.

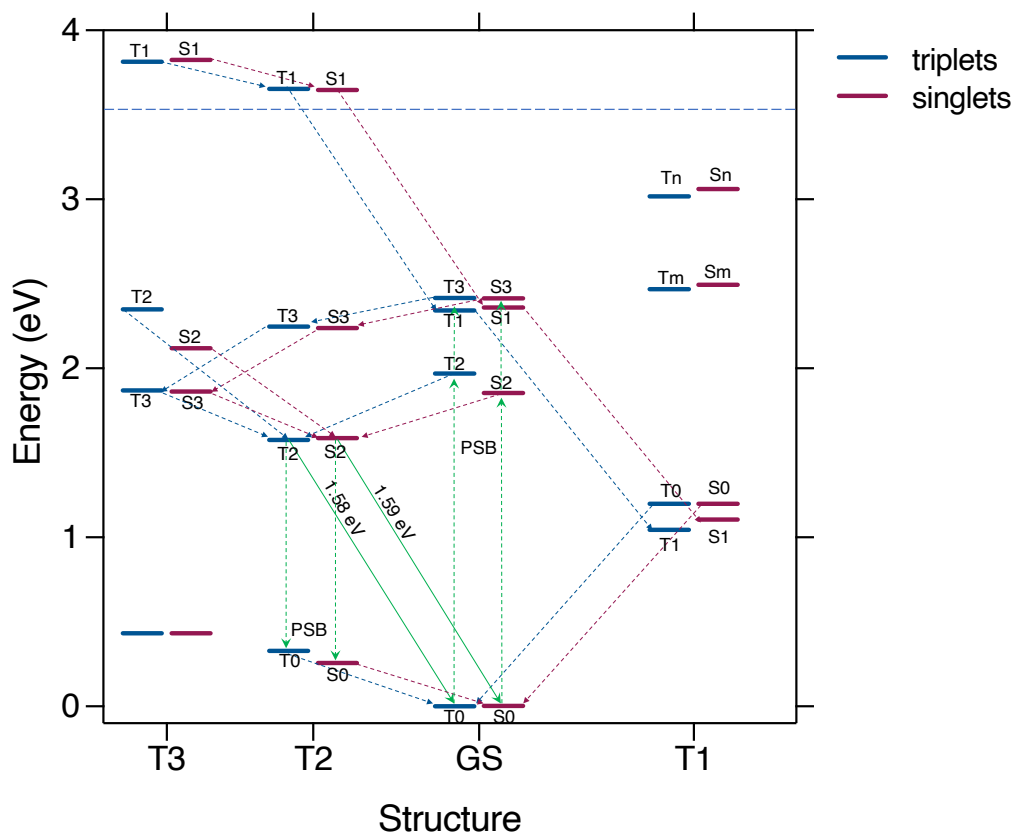

Supplemental Figure 4: Energy level structure as obtained on the HSE(0.32) relaxed ground state (GS), first excited triplet state (T1), second excited triplet state (T2), and the third excited triplet state (T3) geometries. Red and blue dashed arrows indicate non-radiative spin-conserving transitions, i.e. structural relaxation through the emission of phonons, green solid arrows indicate ZPL optical transitions and green dashed arrows indicate phonon-assisted optical transitions, giving rise to phonon side bands (PSB). The blue dashed horizontal line indicates the ionization threshold.

251 The electronic structure is summarized in Supplementary Figure 4 which shows the four

Supplemental Table 4: ZPL energies, radiative decay rates ( $r_{\text{rad}}$ ), and quantum efficiency (QE) as obtained by the HSE(0.32) method. For more details on the non-radiative decay and quantum efficiency see Supplemental Table 5 and the text.

| configuration | transition                      | ZPL (eV) | $r_{\text{rad}}$ (MHz) | QE                    |
|---------------|---------------------------------|----------|------------------------|-----------------------|
| T1            | $n_1'' \rightarrow b'$          | 0.975    | –                      | 0                     |
| S1            | $n_1'' \rightarrow b'$          | 0.950    | –                      | 0                     |
| T2            | $n_2'' \rightarrow n_2' - n_3'$ | 1.578    | 3.18                   | 0.148                 |
| S2            | $n_2'' \rightarrow n_2' - n_3'$ | 1.586    | 2.57                   | 0.123                 |
| T3            | $n_3'' \rightarrow n_2' - n_3'$ | 1.869    | 1.15                   | $3.85 \times 10^{-5}$ |
| S3            | $n_3'' \rightarrow n_2' - n_3'$ | 1.863    | 1.61                   | $5.40 \times 10^{-5}$ |

252 considered atomic configurations and the corresponding vertical energy spectra. Dashed blue and  
 253 red lines indicate the structural relaxation of the different excited states to visualize the variation  
 254 of the energy spectrum on different atomic configurations.

255 The calculated ZPL energies for the six lowest energy triplet and singlet excited states are  
 256 provided in Supplemental Table 4. The expected error bar for the calculated values is  $\approx 0.1$  eV.

257 **\* Spin-conserving decay and optical signal**

258 At first, we examine spin-conserving non-radiative decay pathways from the lowest three  
 259 excited states in the triplet manifold. Note that our discussion is also valid for the singlet manifold  
 260 due to the observed pairing of the singlet-triplet states. The configuration coordinate diagrams  
 261 for the lowest two triplet excited states, T1 and T2, and the for the ground state are depicted in  
 262 Supplementary Figure 5. As can be seen, the lowest energy excited state T1 goes through a huge  
 263 structural relaxation after absorbing a photon in the ground state configuration. At the same time,  
 264 the ground state configuration becomes highly unfavorable on the relaxed T1 structure, thus the T1  
 265 excited state appears to be lower in energy. According to the Seitz model, no photoluminescence  
 266 is expected from the T1 excited states in this case, see Supplemental Table 4. Therefore, excitation

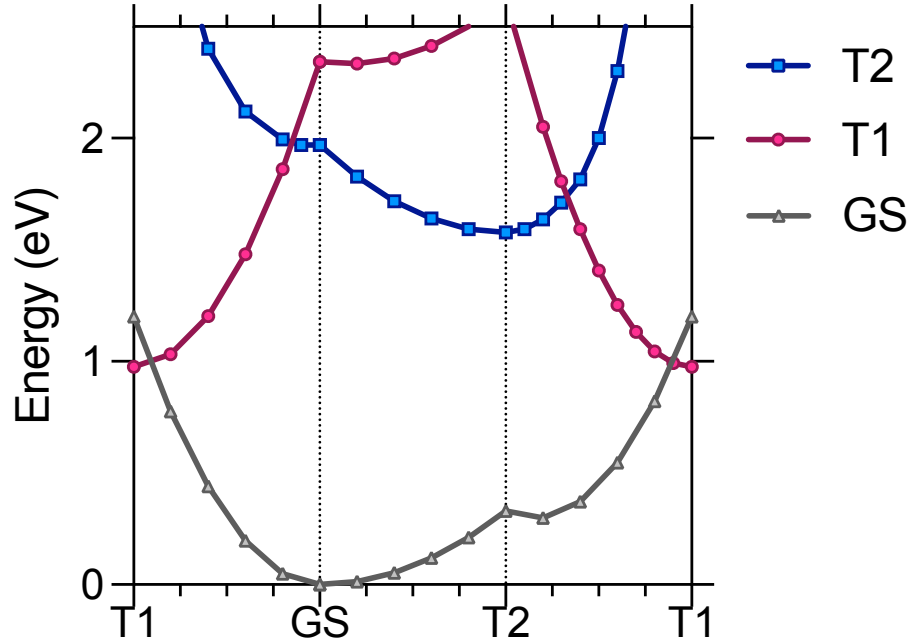

Supplemental Figure 5: Configuration coordinate diagram for T1 and T2 excited states and the ground state.

267 to the T1 state results in a fast relaxation to the ground state. This process does not alter the main  
 268 functioning of the VB2 defect but reduces its quantum efficiency.

269 Excitation to the second excited triplet T2 and single S2 states enables radiative decay. The  
 270 corresponding energies and radiative decay rates are provided in Supplemental Table 4. Note that  
 271 the absorption maximum of the T1 state ( $\approx 2.3$  eV) is higher than the absorption maximum of the  
 272 second excited triplet T2 ( $\approx 1.9$  eV). Therefore, it is recommended to use below 2.3 eV excitation  
 273 to avoid excitation to the T1 excited state and to retain the quantum efficiency of the defect.

274 The system can also decay non-radiatively from the T2 excited triplet state to the T1 excited  
 275 triplet state, see Supplementary Figure 5. By using adiabatic and Franck-Condon approximations  
 276 and an effective one phonon model<sup>13-15</sup>, whose parameters can be found in Supplemental Table 5,  
 277 we obtain  $\tau_{\text{NRD}} = 18.3$  MHz for the non-radiative decay rate at low temperature. By neglecting  
 278 excitations to the dark T1 state and other non-spin conserving relaxation pathways, we obtain

Supplemental Table 5: Non-radiative decay rates as obtained from effective one phonon approximation. The table provides the generalized configuration coordinates differences ( $\Delta Q$ ), the total energy differences ( $\Delta E$ ), the phonon energies in the initial ( $\hbar\omega_i$ ) and the final ( $\hbar\omega_f$ ) states, the Huang-Rhys factor in the final state ( $S_f$ ), and the electron-phonon coupling matrix elements ( $W_{if}$ ) for the considered non-radiative transitions. From these parameters the rate of the spin conserving non-radiative decay ( $r_{\text{NRD}}$ ) can be determined.

| transition | $\Delta Q$<br>(amu <sup>1/2</sup> Å) | $\Delta E$<br>(meV) | $\hbar\omega_i$<br>(meV) | $\hbar\omega_f$<br>(meV) | $S_f$ | $W_{if}$<br>(eV/amu <sup>1/2</sup> /Å) | $r_{\text{NRD}}$<br>(MHz) |
|------------|--------------------------------------|---------------------|--------------------------|--------------------------|-------|----------------------------------------|---------------------------|
| T2 → T1    | 1.24                                 | 603                 | 89.7                     | 93.9                     | 17.2  | $3.15 \times 10^{-4}$ *                | 18.3                      |
| T3 → T2    | 0.81271                              | 292                 | 103                      | 106                      | 8.39  | $6.91 \times 10^{-3}$                  | $2.98 \times 10^4$        |

\* The electron-phonon coupling matrix element  $W_{if}(Q)$  is not constant over the path between the T2 and T1 excited state configurations due to the multiple single electron transitions involved in the non-radiative relaxation process. The  $W_{if}$  coupling constant is obtained by fitting. The standard error of the fitted value is  $5.1 \times 10^{-5}$  eV/amu<sup>1/2</sup>/Å, the relative error is 16%.

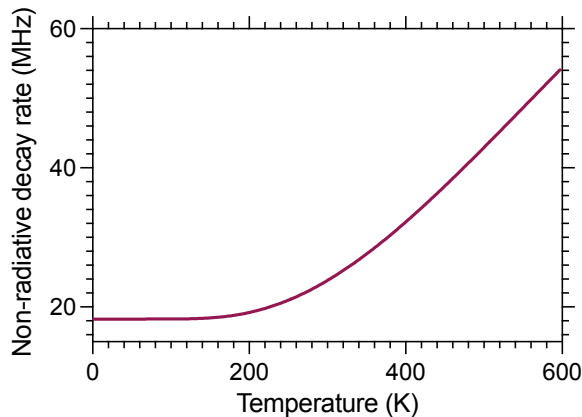

Supplemental Figure 6: Temperature dependence of the non-radiative decay rate between the T2 and T1 triplet excited states.

279 0.148 as an upper limit of the quantum efficiency of the VB2 defect, see Supplemental Table 4.  
 280 The temperature dependence of the decay rate is depicted in Supplementary Figure 7 showing  
 281 that the rate further increases beyond a threshold temperature of  $\approx 200$  K. The upper limit of the  
 282 quantum efficiency is found to be 0.118 at 300 K.

283 The T3 excited state could in principle give rise to phonon emission, with 1.87 eV ZPL  
 284 energy, however, the non-radiative decay from the T3 excited state to T2 excited state is highly  
 285 efficient due to the relatively small, 291 meV energy difference of the states and the similarity of  
 286 their atomic configurations ( $\Delta Q = 0.81$ ). The corresponding non-radiative relaxation rate is as  
 287 high as 29.8 GHz, which is four orders of magnitude larger than the radiative decay rate from the  
 288 T3 excited state. Consequently, the quantum efficiency for the T3 excited state is  $3.85 \times 10^{-5}$ , see  
 289 Supplemental Table 4. Due to the non-radiative decay, excitation to the T3 state dominantly results  
 290 in a PL from the T2 excited state.

291 Thus, the dominant PL emission is obtained from the T2 and S2 excited states with ZPL  
 292 energy 1.578 eV and 1.586 eV, respectively, that are  $\approx 0.13$  eV (or  $\approx 60$  nm) red-shifted compared  
 293 to the ZPL transition energy of the  $V_B$  defect<sup>16</sup>. Note also that the triplet state is found to be  
 294  $\approx 25\%$  brighter than the singlet state. The calculated high-temperature phonon emission spectrum

Supplemental Table 6: Spin-orbit coupling matrix elements calculated on the level of NEVPT2.

|                 |               | $\langle T LS S\rangle$ , (GHz) |             |              |
|-----------------|---------------|---------------------------------|-------------|--------------|
| singlet/triplet | configuration | $ 0\rangle$                     | $ 1\rangle$ | $ -1\rangle$ |
| S0/T0           | T0            | 0.02                            | 0.00        | 0.00         |
| S2/T2           | T2            | 0.03                            | 0.00        | 0.00         |
| T2/S1           | T2            | 2.10                            | 0.00        | 0.00         |
| S3/T3           | T3            | 0.03                            | 0.03        | 0.03         |
| S2/T3           | T3            | 0.00                            | 16.31       | 16.31        |
| S3/T2           | T3            | 0.03                            | 18.13       | 18.13        |

is depicted in Fig. 2b in the main text. By assuming 10% collection efficiency, the saturated intensity of the VB2 defect is in the order of 100 kcps. We note also that the quantum efficiency as well as the intensity of the PL signal are highly dependent on the excitation energy.

**\* Inter-system crossing and spin non-conserving decay**

Besides spin-conserving optical and nonradiative decays, spin-dependent relaxation through inter-system crossings (ISCs) between the singlet and triplet manifolds is also possible. Such decay mechanisms are enabled by spin-orbit interaction and local vibrational modes. The spin-orbit coupling matrix elements calculated on the level of NEVPT2 are provided in Supplemental Table 6.

As we argued in the main text in connection with El-Sayed's rule, the coupling between the nearly degenerate singlet and triplet states is weak. This is confirmed by the calculations revealing small spin-orbit coupling between  $Sx$  and  $Tx$  excited state, where  $x = \{0, 2, 3\}$ , see Supplemental Table 6. Note that the obtained values are in the order of the numerical uncertainties of the applied method. Therefore, the values can be considered as upper limits for the spin-orbit coupling in this case. Using an effective one phonon model<sup>13-15</sup>, we calculate the ISC decay rates for the most relevant spin non-conserving decay rates, see Supplemental Table 7. As can be seen, the decay

Supplemental Table 7: Inter-system crossing rates as obtained from effective one phonon approximation. The table provides the generalized configuration coordinates differences ( $\Delta Q$ ), the total energy differences ( $\Delta E$ ), the phonon energies in the initial ( $\hbar\omega_i$ ) and the final ( $\hbar\omega_f$ ) states, the Huang-Rhys factor in the final state ( $S_f$ ), and the spin-orbit coupling matrix elements ( $\lambda$ ) for the considered non-radiative transitions. From these parameters the rate of spin non-conserving decay ( $r_{\text{ISC}}$ ) can be determined.

| transition | $\Delta Q$<br>(amu <sup>1/2</sup> Å) | $\Delta E$<br>(meV) | $\hbar\omega_i$<br>(meV) | $\hbar\omega_f$<br>(meV) | $S_f$                 | $\lambda$<br>(GHz) | $r_{\text{ISC}}$<br>(MHz) |
|------------|--------------------------------------|---------------------|--------------------------|--------------------------|-----------------------|--------------------|---------------------------|
| S0 → T0    | $9.60 \times 10^{-3}$                | 3.40                | 52.8                     | 52.7                     | $5.80 \times 10^{-4}$ | 0.018              | $2.53 \times 10^{-5}$     |
| T2 → S2    | 0.175                                | 12.2                | 93.7                     | 93.7                     | 0.343                 | 0.030              | $3.32 \times 10^{-5}$     |
| T2 → S1    | 1.24                                 | 603                 | 89.7                     | 93.9                     | 17.2                  | 2.10               | $9.71 \times 10^{-4}$     |
| T3 → S2    | 0.813                                | 292                 | 103                      | 106                      | 8.39                  | 18.1               | 0.561                     |

311 rate from the S0 excited singlet state to the T0 ground state triplet state is  $r_{\text{ISC}} = 25.3$  Hz at low  
312 temperature, which does not significantly change even at 300 K. We note also that the dipole-dipole  
313 coupling-induced spin relaxation of the S0 state is suppressed by the 3.3 meV exchange splitting  
314 of the S0 and T0 states. Consequently, the S0 excited state is long-lived and can serve as a memory  
315 to store population information.

316 Inter-system crossing between the different singlet-triplet branches can be more efficient.  
317 Indeed, we obtain  $r_{\text{ISC}} = 0.561$  MHz ISC decay rate for the T3→S3 transition. On the other hand,  
318 we obtain a small ISC rate for the T2→S1 transition,  $r_{\text{ISC}} = 0.971$  kHz, due to the small overlap  
319 of the phonon wavefunctions in the relaxed configurations of T1 and T2 excited states.

320 \* **Single-shot read-out**

321 The T2 bright excited triplet state and the S0 bright excited singlet state have different life-  
322 times, thus the VB2 defect exhibits different PL intensities depending on the population of the  
323 singlet and triplet branches. Note also that the overall ISC rate between the triplet and singlet man-

324 ifolds under optical pumping that addresses only the T2 and S2 excited states is a few orders of  
 325 magnitude smaller than the photon emission rate of the excited states. Consequently, the popula-  
 326 tion of the singlet and triplet manifolds may be read out non-destructively before an ISC transition  
 327 happens between them. Therefore, the time trace of the PL signal of a single VB2 defect exhibits  
 328 jumps in the intensity that corresponds to quantum jumps between the singlet and the triplet mani-  
 329 folds as illustrated in Supplementary Figure 7. Due to the statistical noise of the photon collection,  
 330 the quantum jumps are purely resolved even in optimal conditions, see Supplementary Figure 7.  
 331 In order to read out the total spin state non-destructively with low statistical errors, the radiative  
 332 lifetime of the excited state needs to be reduced by nanophotonic cavities<sup>17</sup>.

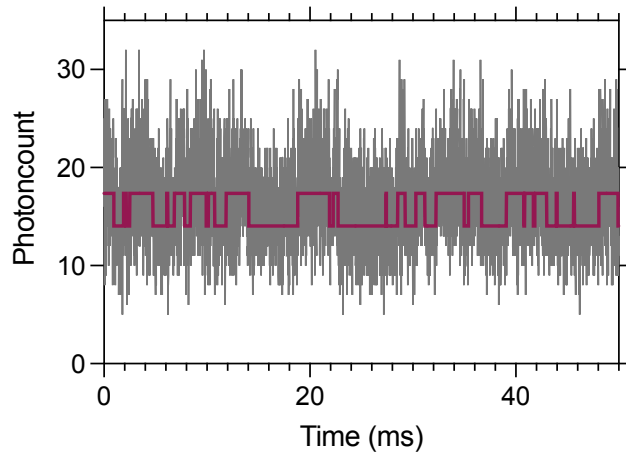

Supplemental Figure 7: Quantum jumps in the photoluminescence signal of the VB2 defect. In  
 the calculation, we use 10  $\mu\text{s}$  time bin and assume optimal conditions, i.e. 100% photon collection  
 efficiency and saturated PL signal.

333 \* **Optical spin state initialization and optically detected magnetic resonance**

334 As can be seen in Supplemental Table 6, the spin-orbit coupling matrix element between the  
 335 low energy singlet-triplet pairs, S0/T0, S2/T2, and S1/T2, are strictly spin state selective, i.e. only  
 336 transition to and from the  $m_S = 0$  state in the triplet manifold is allowed. Therefore, any triplet-  
 337 singlet-triplet double ISC transition polarizes the electron spin into the  $|m_S = 0\rangle \equiv |0\rangle$  state.

338 Note also that the VB2 defect in the  $|0\rangle$  and the  $|\pm 1\rangle$  triplet spin states emits light with

339 different intensities. As no ISC is possible from  $|\pm 1\rangle$  spin state, the defect remains in the triplet  
 340 state and emits with the corresponding PL intensity. On the other hand, ISC transitions are allowed  
 341 for the  $|0\rangle$  spin state, thus the time-averaged population is shared between the singlet state S0  
 342 and the  $|0\rangle$  spin state of the T0 triplet ground state. Due to the lower PL intensity of the singlet  
 343 manifold, the defect is dimmer when the spin is prepared in the  $|0\rangle$  state, than  $|\pm 1\rangle$  state.

344 By applying a resonant microwave excitation between the split spin states in the triplet  
 345 ground state the PL intensity of the VB2 defect changes. In such optically detected magnetic  
 346 resonance (ODMR) measurement, the maximal continuous wave optical contrast of the different  
 347 spin states is defined as

$$C_{\text{CW}}^{\text{max}} = \frac{I_{\text{MW-on}}}{I_{\text{MW-off}}} - 1 = \frac{I^{\pm} + I^0}{2I^0} - 1 \approx \frac{r_{\text{rad}}^{T0} (r_{\text{rad}}^{S0} + r_{\text{NRD}})}{r_{\text{rad}}^{S0} (r_{\text{rad}}^{T0} + r_{\text{NRD}}) + r_{\text{rad}}^{T0} (r_{\text{rad}}^{S0} + r_{\text{NRD}})} - \frac{1}{2} = +0.0459 \quad (1)$$

348 where  $I^{\pm} = I^{T0}$ ,  $I^0 \approx (I^{T0} + I^{S0})/2$ ,  $I^{T0} = r_{\text{rad}}^{T0} / (r_{\text{rad}}^{T0} + r_{\text{NRD}})$ , and  $I^{S0} = r_{\text{rad}}^{S0} / (r_{\text{rad}}^{S0} + r_{\text{NRD}})$ .

349 Note also that the ground state longitudinal spin relaxation has negative effects both on the  
 350 spin state initialization and on the ODMR contrast. Due to the low ISC rate between the singlet and  
 351 the triplet manifolds the dwell time in the ground state may be in the order of the spin relaxation  
 352 time T1. To achieve maximal contrast, a high excitation rate is needed to shorten the dwell time in  
 353 the ground state.

354 So far we have focussed on the spin polarization mechanism and the ODMR through the  
 355 lowest five excited states, including only T2 and T1 triplets and S2, S1, and S0 singlets. It is  
 356 apparent from the excited state energy spectrum, see Supplementary Figure 4, that the possible  
 357 relaxation pathways considerably depend on the applied excitation energy. Higher than 1.86 eV  
 358 excitation gives rise to additional, potentially more efficient ISCs between the third optically ex-  
 359 cited singlet-triplet states and the lower lying states, see Supplemental Table 6 and Supplemental  
 360 Table 7. Therefore, higher energy excitation is preferable for spin state initialization. On the other  
 361 hand, the increased probability of non-radiative decay and reduced quantum efficiency may quench  
 362 the PL signal of the defect in such cases. A pulsed two-excitation laser setup can utilize the advan-  
 363 tages of both the low and the high-energy excitations. For efficient spin state initialization one may  
 364 use a strong 1.9-2.3 eV excitation laser, while for the read-out a strong, below 1.8 eV excitation

365 laser is recommended.

## 366 **5 Supplementary Note 5 - Spin Hamiltonian of the VB2 defect**

367 In this supplementary note, we discuss the peculiar features of the spin Hamiltonian of the VB2  
368 defect that arise due to the defect's planar configuration and its unusual spin density. Throughout  
369 the discussion, we set the  $z$  axis parallel to the  $c$ -axis.

370 The total spin Hamiltonian of the defect including the most relevant interactions can be  
371 written as

$$H = H_{\text{ZFS}} + H_{\text{Zee}} + H_{\text{NucZee}} + H_{\text{hyperfine}} + H_{\text{Q}}, \quad (2)$$

372 where  $H_{\text{ZFS}}$  describes the zero-field splitting interaction,

$$H_{\text{Zee}} = g_e \mu_B \mathbf{S} \mathbf{B} \quad (3)$$

373 describes the Zeeman interaction, where  $g_e \approx 2$ ,  $\mu_B$  is the Bohr magneton,  $\mathbf{S}$  is the electron spin  
374 operator vector, and  $\mathbf{B}$  is the magnetic field vector,

$$H_{\text{NucZee}} = -\mu_N \sum_i g_{N_i} \mathbf{I}_i \mathbf{B} \quad (4)$$

375 describes the nuclear Zeeman interaction, where  $\mu_N$  is the nuclear magneton,  $g_{N_i}$  is the nuclear  
376  $g$ -factor of nuclei  $i$ , and  $\mathbf{I}_i$  is the nuclear spin operator vector of nuclei  $i$ ,  $H_{\text{hyperfine}}$  describes the  
377 hyperfine interaction, and  $H_{\text{Q}}$  describes the quadrupole interaction. Details on the zero-field in-  
378 teraction, the hyperfine interaction, and the quadrupole interaction are provided in the subsequent  
379 sections.

### 380 **\* Zero-field splitting**

381 First of all, we note that the spin-orbit contribution to the zero-field splitting (ZFS) is marginal,  
382 found to be 11 MHz on the level NEVPT2, therefore we neglect it hereinafter. Due to symmetry  
383 reasons, the spin-spin zero-field splitting tensor takes the following form in our coordinate system  
384 with  $z \parallel c$

$$D = \begin{pmatrix} D_{xx} & D_{xy} & 0 \\ D_{xy} & D_{yy} & 0 \\ 0 & 0 & D_{zz} \end{pmatrix}. \quad (5)$$

385 After diagonalization, the tensor can be written as

$$D = \begin{pmatrix} D_{x'} & 0 & 0 \\ 0 & D_{y'} & 0 \\ 0 & 0 & D_z \end{pmatrix}, \quad (6)$$

386 where  $D_z = D_{zz}$  corresponds to an eigenvector parallel to the original  $z$  axis.  $D_{x'}$  and  $D_{y'}$  corre-  
 387 spond to inplane eigenvector that defines the rotated  $x$  and  $y$  axes,  $x'$  and  $y'$  respectively.

388 The diagonal elements  $D_{x'}$ ,  $D_{y'}$ , and  $D_z$  of the ZFS tensor obtained from spin contamination  
 389 error corrected DFT calculations are 386.2 MHz,  $-929.2$  MHz, and 542.6 MHz, respectively.  
 390 Using higher level NEVPT2 theory but smaller model of the VB2 structure we obtain 632.9 MHz,  
 391  $-1383.2$  MHz, and 750.3 MHz  $D_{x'}$ ,  $D_{y'}$ , and  $D_z$  diagonalized ZFS tensor elements, respectively.  
 392 The two methods qualitatively agree on the structure of the ZFS tensor, while we attribute the  
 393 small numerical differences to the quantum confinement effects. Hereinafter we use the DFT ZFS  
 394 results.

395 According to the convention, the quantization direction is defined by the eigenvector of the  
 396 largest absolute diagonal element. In the case of the VB2 defect, the conventional quantization  
 397 direction is  $y'$  corresponding to the diagonal element  $D_{y'}$ . The obtained ZFS parameters are  $D =$   
 398  $1.394$  GHz and  $E = 78.2$  MHz. Here, we note that a similar  $D$  value has been recently reported in  
 399 neutron irradiated hBN samples in Refs. [18,19]

400 Note on the other hand that there is an inconsistency between the quantization axes defined  
 401 by the ZFS and the spin-orbit interaction in the ISC processes. As we have seen before, the spin  
 402 selectivity is defined in the quantization basis parallel to the  $c$  axis, while using the ZFS tensor the  
 403 conventional quantization axis is in-plane. Such an inconsistency is only possible for low symme-  
 404 try defect configurations, like the VB2 defect. Throughout this study, we use the polarization basis  
 405 defined by the spin-orbit interaction as our quantization basis. The corresponding non-conventional  
 406 ZFS parameter are  $\tilde{D} = -814$  MHz and  $\tilde{E} = -658$  MHz.

407 The ZFS spin Hamiltonian can be written as

$$\hat{H}_{\text{ZFS}} = \mathbf{S} \mathbf{D} \mathbf{S} = D_{x'} S_{x'}^2 + D_{y'} S_{y'}^2 + D_z S_z^2. \quad (7)$$

408 In the polarization basis, the matrix form of the Hamiltonian reads as

$$H_{ZFS} = \frac{1}{2} \begin{pmatrix} D_z & 0 & D_{x'} - D_{y'} \\ 0 & -2D_z & 0 \\ D_{x'} - D_{y'} & 0 & D_z \end{pmatrix}, \quad (8)$$

409 The  $|0\rangle$  state, in which the system is polarized in the optical cycle, is a good eigenstate of the Hamil-  
 410 tonian, while the  $|\pm 1\rangle$  states mix and form new eigenstates of the zero magnetic field Hamiltonian,  
 411  $|+\rangle = (|-1\rangle + |+1\rangle)/\sqrt{2}$  and  $|-\rangle = (|-1\rangle - |+1\rangle)/\sqrt{2}$ . After diagonalization of the ZFS spin  
 412 Hamiltonian matrix, we obtain the following eigenvalues of  $-929.2$ ,  $386.2$ , and  $542.6$  MHz for  
 413 the eigenstates  $|+\rangle$ ,  $|-\rangle$ , and  $|0\rangle$  that correspond to the  $D'_y$ ,  $D'_z$ , and  $D_z$  ZFS diagonal matrix ele-  
 414 ments, respectively. The observed level structure exhibits a giant effective transverse ZFS splitting  
 415  $2\tilde{E} = 1.315$  GHz.

#### 416 \* Hyperfine and quadrupole interaction

417 The hyperfine Hamiltonian term can be written as

$$H_{\text{hyperfine}} = \sum_i \mathbf{S} A_i \mathbf{I}_i, \quad (9)$$

418 where  $A_i$  is the hyperfine tensor and  $\mathbf{I}_i$  is the nuclear spin operator vector of nuclei  $i$ . As the most  
 419 abundant boron and nitrogen nuclei possess total spin  $I > 1$ , quadrupole interaction needs to be  
 420 taken into account as well. The corresponding Hamiltonian term can be written as

$$H_Q = \frac{C_q}{4I(2I-1)} \sum_i I_{z,i}^2, \quad (10)$$

421 where parameter  $C_q$  defines the coupling strength.

422 We provide the sites of strong hyperfine interactions and the corresponding hyperfine tensors  
 423 in Supplementary Figure 8 and in Supplemental Table 8, respectively. The values in the table  
 424 are obtained considering  $^{11}\text{B}$  and  $^{14}\text{N}$  isotopes, whose natural abundances are 80.1% and 99.5%,  
 425 respectively. Due to symmetry reasons the  $A_{xz}$  and  $A_{yz}$  elements of the tensor are zero, therefore  
 426 the hyperfine splitting is  $A_z = A_{zz}$ .

427 Table 9 provides the calculated quadrupole parameters for the neighboring sites of the neutral  
 428 unstrained VB2 defect as well as for the perfect hBN structure. As can be seen, there are several

Supplemental Table 8: Relevant hyperfine coupling tensors for the most abundant boron and nitrogen nuclei in the triplet ground state of the VB2 defect in non-strained and +5% strained configurations. For the considered sites see Supplementary Figure 8. Due to symmetry constraints the  $A_{xz}$  and the  $A_{yz}$  element of the tensor are zero. Our coordinate system is chosen so that the  $y$ -axis is parallel to the axis of the double vacancy sites of the VB2 configuration and the  $z$ -axis is perpendicular to the BN plane. All values are in MHz.

| strain          | no strain |          |          |          | +5% strain |          |          |          |
|-----------------|-----------|----------|----------|----------|------------|----------|----------|----------|
| position        | $A_{xx}$  | $A_{yy}$ | $A_{zz}$ | $A_{xy}$ | $A_{xx}$   | $A_{yy}$ | $A_{zz}$ | $A_{xy}$ |
| N <sub>1</sub>  | 5.194     | 5.582    | 60.483   | -0.037   | 3.621      | 4.261    | 63.535   | 0.322    |
| N <sub>2</sub>  | 83.332    | 55.465   | 50.377   | 16.522   | 63.070     | 31.294   | 18.682   | 26.859   |
| N <sub>3</sub>  | 65.008    | 48.842   | 45.621   | -9.772   | 10.190     | 7.503    | 6.847    | -1.726   |
| N <sub>1l</sub> | -0.794    | -0.826   | 10.197   | -0.183   | 0.170      | 0.723    | 9.217    | -0.216   |
| B <sub>2l</sub> | -6.780    | -1.138   | -8.663   | -0.495   | -13.168    | -6.787   | -15.538  | -2.169   |
| B <sub>2r</sub> | 2.224     | 4.083    | -2.872   | -4.344   | -14.982    | -12.293  | -19.693  | -4.295   |
| B <sub>3r</sub> | -4.623    | -1.849   | -6.359   | -0.284   | -0.610     | -0.605   | -1.593   | -0.416   |

Supplemental Table 9: Relevant quadrupolar parameters  $C_q$  of the neighbouring atoms of the VB2 defect. For comparison, we also provide  $C_q$  parameters for the perfect hBN structure. All values are in MHz and provided for the most abundant boron and nitrogen nuclei.

| VB2             |        |
|-----------------|--------|
| position        | $C_q$  |
| B               | -5.622 |
| N <sub>1</sub>  | 4.276  |
| N <sub>2</sub>  | 1.889  |
| N <sub>3</sub>  | -0.787 |
| N <sub>1l</sub> | 3.971  |
| perfect         |        |
| position        | $C_q$  |
| B               | 3.717  |
| N               | 0.022  |

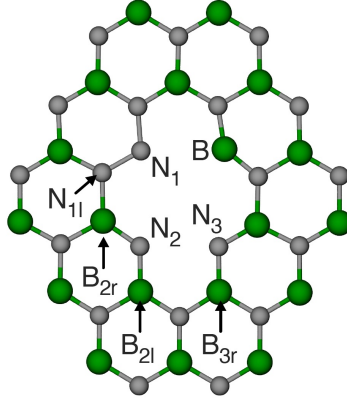

Supplemental Figure 8: Nuclear spin sites of strong hyperfine coupling.

429 quadrupole parameters that deviate from the bulk values. In particular, the closest nitrogen atoms  
 430 exhibit sizeable quadrupole splitting in the VB2 configuration.

431 **\* Notes on the spin properties**

432 Due to symmetry and the low dimensionality of the structure, the hyperfine Hamiltonian  
 433 specified in Eq. (9) includes terms that neither account for nuclear spin precession nor electron  
 434 spin precession. The only non-vanishing hyperfine terms can be described by the  $S_z I_z$  and the  
 435  $S_{\pm} I_{\mp}$  and  $S_{\pm} I_{\pm}$  operator combinations that account for hyperfine splitting and mutual flip-flops  
 436 of the electron and nuclear spins. The hyperfine splitting is zero for the  $|0\rangle$  electron spin state  
 437 as well as for the  $|\pm\rangle$  mixed spin states due to the transverse zero-field splitting governed by  $\tilde{E}$ .  
 438 It is important to note that the spin flip-flop terms are largely suppressed by the splitting of the  
 439 electron spin states that are typically an order of magnitude larger than the hyperfine interaction.  
 440 Consequently, the hyperfine splitting is vanishing at  $B = 0$ . The residual splitting is due to the  
 441 weak mixing of the electron spin states  $|0\rangle$  and  $|\pm\rangle$  induced by the spin flip-flop terms. The spin  
 442 mixing is the strongest between the  $|0\rangle$  and  $|-\rangle$  pair of states whose splitting is the smallest.

443 Magnetic field dependence of the hyperfine structure is depicted in Supplementary Figure 9.  
 444 As can be seen, the  $\tilde{E}$  splitting that appears for the perpendicular to plane quantization axis sup-  
 445 presses the hyperfine splitting of the lower branch, that corresponds to the state  $|+\rangle$ , at  $B = 0$ .

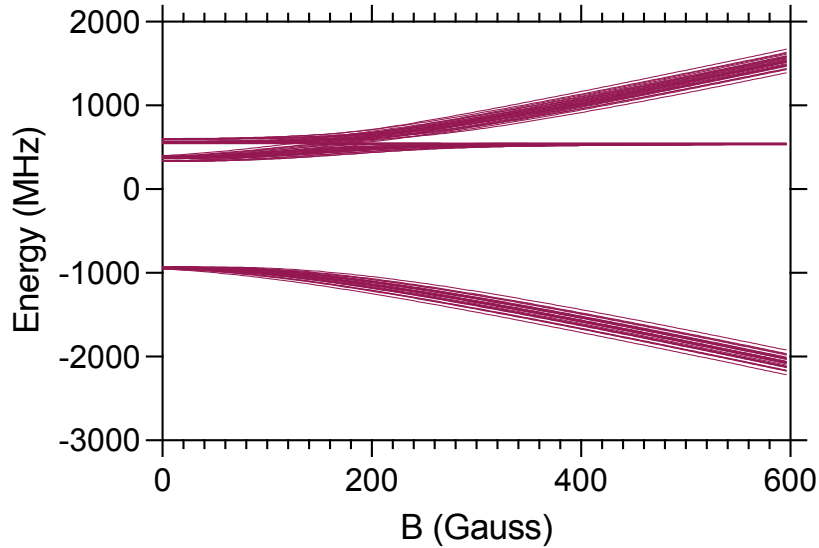

Supplemental Figure 9: Fine and hyperfine energy level structure of the VB2 center interacting with its first nearest neighbour  $^{14}\text{N}$  nitrogen nuclei. The magnetic field is set parallel to the  $c$  axis.

446 The suppression of the hyperfine interaction has a favorable effect on the spin coherence and the  
 447 ODMR linewidth, see main text. Due to the dense nuclear spin bath of the host material, such  
 448 decoherence protection schemes may be of crucial importance for practical qubit applications in  
 449 hBN.

450 Recent developments in understanding  $C_{1h}$  symmetric divacancy qubits in SiC have revealed  
 451 related decoherence protection scheme<sup>20</sup> that utilizes the  $E$  splitting and resonant driving between  
 452 the  $|\pm\rangle$  states. The larger the  $E$  splitting, the more efficient the suppression of magnetic  $1/f$  noise.  
 453 Here, we note that the value of the transverse zero-field splitting depends on the quantization axis,  
 454 while the spin properties and the dynamics do not. An alternative interpenetration of the spin  
 455 properties of the VB2 defect can be obtained by using the conventional in-plane quantization axis  
 456 obtained as the principal axis of the diagonalized ZFS tensor. In this basis, the lower lying state is  
 457 the  $|0\rangle$  while the highest one is the  $|+\rangle$  state at zero magnetic fields.

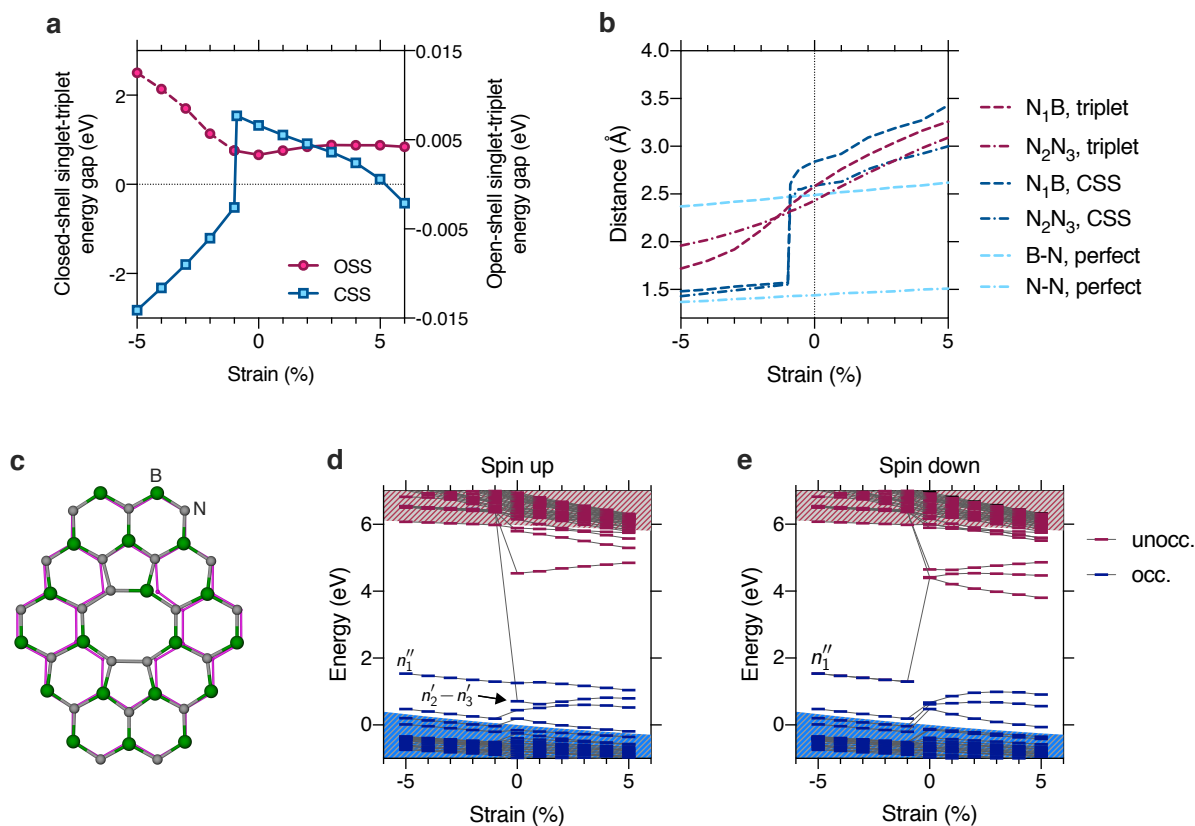

Supplemental Figure 10: Strain dependence of the electronic structure of the VB2 defect. **a** Biaxial strain dependence of the open-shell singlet (OSS)-triplet (blue) and the closed-shell singlet (CSS)-triplet (red) splitting. The triplet state is stable in the  $\{-0.9\%, +5.0\%$  strain interval. The sudden change observed at  $-0.9\%$  strain is due to the creation of new bonds. **b** Strain dependence of atomic distances in the triplet (red) and the CSS (dark blue) states of the VB2 defect as well as in the perfect hBN lattice (light blue). **c** Structure of the CSS ground state (green and grey balls) and the triplet state (pink wire frame) at  $-1\%$  strain. **d** and **e** Strain dependence of the Kohn-Sham electronic structure as obtained from HSE(0.32) calculations for the spin-up and spin-down channels, respectively.

## 458 **6 Supplementary Note 6 - Strain dependence of the electronic structure**

459 Strain is an important factor in exfoliated few-layer materials<sup>21,22</sup>, that in turn makes the control of  
 460 single photon emitters' and qubits' electronic structure possible<sup>23-26</sup>. Since the VB2 configuration

461 is a vacancy complex with bonding and anti-bonding planar defect orbitals, the electronic structure  
 462 may be highly sensitive to applied strain. In Supplementary Figure 10a, we study the dependence  
 463 of the open-shell singlet (OSS)-triplet and the closed-shell singlet (CSS)-triplet gaps on the applied  
 464 biaxial strain. As can be seen, the triplet state is always slightly more favorable than the OSS state.  
 465 By stretching the structure the 3.3 meV gap observed at zero strain increases to 5 meV. This is due  
 466 to the fact that the  $n'_2$  and  $n'_3$  dangling bonds no longer form bonding and anti-bonding states in  
 467 the stretched configurations and the spin density is only formed by  $n''_1$  and  $n'_2$  states, in contrast to  
 468 the unstrained case. The change in the localization gives rise to a slight increase in the exchange  
 469 energy. By further stretching the structure, the CSS state became energetically favorable.

470 For negative strain, we observe a sudden change in the CSS-triplet energy splitting, i.e. for  
 471 strain greater than  $-0.9\%$  the CSS state becomes the ground state after the creation of new bonds  
 472 and rearrangement of the electronic structure. In Supplementary Figure 10b we plot the distances  
 473 of the  $N_1$  and B and the  $N_2$  and  $N_3$  atoms in the triplet and in the CSS configuration as a function of  
 474 the applied biaxial strain. For the sake of comparison, we also show the nearest neighbor nitrogen-  
 475 boron bond length and the second nearest neighbor nitrogen-nitrogen distance in the defect-free  
 476 strained hBN structure. As can be seen, the atomic distances continuously change in the triplet  
 477 state. Notably, the distances of the neighboring atoms of the double vacancy change considerably  
 478 faster than the atomic distances in the perfect hBN structure. This indicates that the VB2 complex  
 479 absorbs the stress applied to the defective hBN structure. For the CSS electronic configuration,  
 480 we observe a jump in the atomic distances at  $-0.9\%$  strain, where both the  $N_1$  and B and the  
 481  $N_2$  and  $N_3$  distances change from the level of second nearest neighbor distance to first neighbor  
 482 distance, see Supplementary Figure 10b. The formation of a pair of new bonds and two pentagons  
 483 is clearly visible in Supplementary Figure 10c. Considering the Kohn-Sham electronic structure as  
 484 obtained by HSE(0.32) functional, we observe drastic changes at  $-0.9\%$  strain, see Supplementary  
 485 Figure 10d and e. In the triplet ground state the anti-bonding  $n'_2 - n'_3$  and the  $n''_1$  orbitals are half  
 486 occupied. When the new bonds are formed, the electron from the anti-bonding state is moved to  
 487 the  $n''_1$  orbital to give rise to a closed shell configuration. In addition, the fully occupied  $n'_1$  and  
 488 the unoccupied  $b'$  states mix and form a fully occupied  $n'_1 + b'$  bonding state and an unoccupied

489  $n'_1 - b'$  anti-bonding state. The former state appears in the valence band, while the latter appears  
 490 in the conduction band.

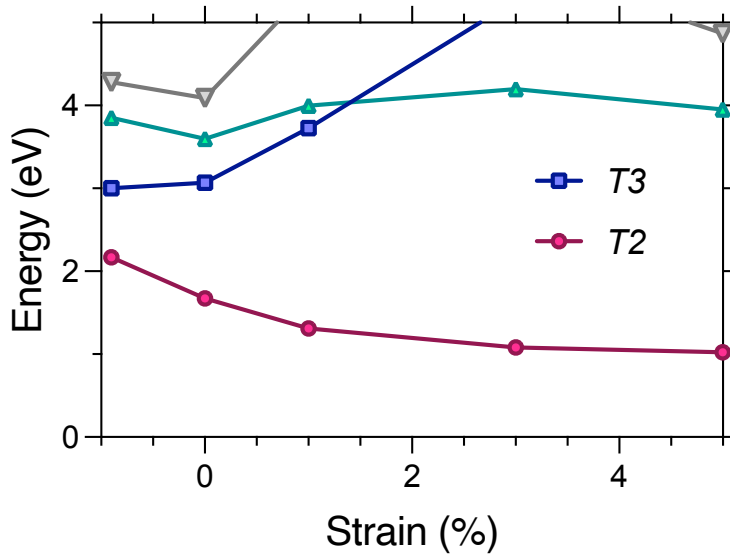

Supplemental Figure 11: Uni-axial strain dependence of the vertical excited state energy spectrum obtained by DMRG calculations using HSE(0.32) relaxed ground state atomic configurations. The figure depicts only the triplet energy states.

491 Variation of the many-body energy level structure as a function of the applied uni-axial strain  
 492 is investigated on the level of DMRG, see Supplementary Figure 11. As can be seen, the energy of  
 493 the second excited triplet state T2 monotonously decreases, while the energy of the third excited  
 494 triplet state T3 monotonously increases as the structure is stretched. This is in-line with the ob-  
 495 served transitions in the single particle energy structure showing the decomposition of the  $n'_2 \pm n'_3$   
 496 bonding and anti-bonding orbitals in the stretched configuration. These results indicate that the  
 497 ZPL energy of the VB2 center decreases with applied strain. Strain dependence of the optical  
 498 signal of the VB2 center can be used to monitor the local strain in the hBN sample.

499 Strain dependence of the conventional and the non-conventional ZFS parameters is depicted  
 500 in Supplementary Figure 12 for the  $\{-0.9\%, +5.0\%$  strain interval. As can be seen, the ZFS  
 501 parameters depend only slightly on the applied strain as large as +5%. More specifically, positive

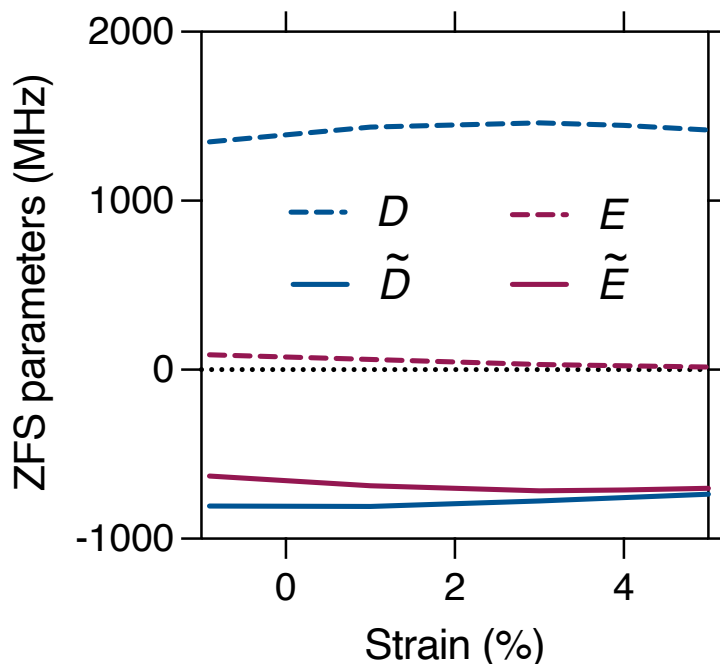

Supplemental Figure 12: Uni-axial strain dependence of the conventional ZFS parameters ( $D$  and  $E$ ) and the non-conventional ZFS parameter ( $\tilde{D}$  and  $\tilde{E}$ ), which are defined by using a perpendicular to plane quantization axis.

502 strain tends to reduce the transverse ZFS splitting in the conventional basis whose quantization axis  
 503 is nearly parallel to the  $V_B$ - $V_N$  axis. Accordingly, the non-conventional ZFS parameters, defined  
 504 in the polarization basis, approach degeneracy.

505 Strain dependence of the hyperfine tensors is investigated in Supplemental Table 8, where we  
 506 provide the hyperfine values for the unstrained configuration and for the +5% uniaxially strained  
 507 configuration. Note that for the 5% stretched configuration the spin density redistributes and lo-  
 508 calizes dominantly on  $N_1$  and  $N_2$  nitrogen atoms. The hyperfine tensors listed in Supplemental  
 509 Supplemental Table 8 change accordingly, i.e. the hyperfine values marginally change for the  $N_1$   
 510 site, slightly reduce for the  $N_2$  site, and considerably reduce for the  $N_3$  site. It is notable, however,  
 511 that the hyperfine interaction considerably increases on the first neighbor borons,  $B_{2l}$  and  $B_{2r}$ , of  
 512 the  $N_2$  sites.

513 **References**

- 514 1. Heyd, J., Scuseria, G. E. & Ernzerhof, M. Hybrid functionals based on  
515 a screened coulomb potential. *J. Chem. Phys.* **118**, 8207 (2003). URL  
516 <http://dx.doi.org/10.1063/1.1564060>.
- 517 2. Heyd, J., Scuseria, G. E. & Ernzerhof, M. Erratum: “hybrid functionals based on a screened  
518 coulomb potential” [j. chem. phys. 118, 8207 (2003) ]. *J. Chem. Phys.* **124**, 219906 (2006).  
519 URL <http://dx.doi.org/10.1063/1.2204597>.
- 520 3. Weston, L., Wickramaratne, D., Mackoito, M., Alkauskas, A. & Van de Walle, C. G. Native  
521 point defects and impurities in hexagonal boron nitride. *Phys. Rev. B* **97**, 214104 (2018). URL  
522 <https://link.aps.org/doi/10.1103/PhysRevB.97.214104>.
- 523 4. Strand, J., Larcher, L. & Shluger, A. L. Properties of intrinsic point defects and dimers in  
524 hexagonal boron nitride. *Journal of Physics: Condensed Matter* **32**, 055706 (2019). URL  
525 <https://doi.org/10.1088/1361-648x/ab4e5d>.
- 526 5. Toledo, J. R. *et al.* Electron paramagnetic resonance signature of point defects in  
527 neutron-irradiated hexagonal boron nitride. *Phys. Rev. B* **98**, 155203 (2018). URL  
528 <https://link.aps.org/doi/10.1103/PhysRevB.98.155203>.
- 529 6. Gottscholl, A. *et al.* Initialization and read-out of intrinsic spin defects in a van der  
530 Waals crystal at room temperature. *Nature Materials* **19**, 540–545 (2020). URL  
531 <https://www.nature.com/articles/s41563-020-0619-6>. Number: 5 Pub-  
532 lisher: Nature Publishing Group.
- 533 7. Fischer, M. *et al.* Controlled generation of luminescent centers in hexagonal boron  
534 nitride by irradiation engineering. *Science Advances* **7**, eabe7138 (2021). URL  
535 <https://advances.sciencemag.org/content/7/8/eabe7138>. Publisher:  
536 American Association for the Advancement of Science Section: Research Article.
- 537 8. Kianinia, M., White, S., Fröch, J. E., Bradac, C. & Aharonovich, I. Generation  
538 of Spin Defects in Hexagonal Boron Nitride. *ACS Photonics* **7**, 2147–2152 (2020).

- 539 URL <https://doi.org/10.1021/acsp Photonics.0c00614>. Publisher: American  
540 Chemical Society.
- 541 9. Ghaderzadeh, S., Kretschmer, S., Ghorbani-Asl, M., Hlawacek, G. & Krasheninnikov, A. V.  
542 Atomistic Simulations of Defect Production in Monolayer and Bulk Hexagonal Boron Ni-  
543 tride under Low- and High-Fluence Ion Irradiation. *Nanomaterials* **11**, 1214 (2021). URL  
544 <https://www.mdpi.com/2079-4991/11/5/1214>. Number: 5 Publisher: Multidis-  
545 ciplinary Digital Publishing Institute.
- 546 10. Gao, X. *et al.* Femtosecond Laser Writing of Spin Defects in Hexag-  
547 onal Boron Nitride. *ACS Photonics* **8**, 994–1000 (2021). URL  
548 <https://doi.org/10.1021/acsp Photonics.0c01847>. Publisher: American  
549 Chemical Society.
- 550 11. Chen, Y. & Quek, S. Y. Photophysical Characteristics of Boron Vacancy-Derived Defect Cen-  
551 ters in Hexagonal Boron Nitride. *The Journal of Physical Chemistry C* **125**, 21791–21802  
552 (2021). URL <https://doi.org/10.1021/acs.jpcc.1c07729>. Publisher: Ameri-  
553 can Chemical Society.
- 554 12. Gali, A., Janzén, E., Deák, P., Kresse, G. & Kaxiras, E. Theory of spin-conserving excitation  
555 of the  $n-v^-$  center in diamond. *Phys. Rev. Lett.* **103**, 186404 (2009).
- 556 13. Alkauskas, A., Yan, Q. & Van de Walle, C. G. First-principles theory of nonradiative  
557 carrier capture via multiphonon emission. *Physical Review B* **90**, 075202 (2014). URL  
558 <https://link.aps.org/doi/10.1103/PhysRevB.90.075202>.
- 559 14. Wu, F., Smart, T. J., Xu, J. & Ping, Y. Carrier recombination mechanism at defects in wide  
560 band gap two-dimensional materials from first principles. *Physical Review B* **100**, 081407  
561 (2019). URL <https://link.aps.org/doi/10.1103/PhysRevB.100.081407>.  
562 Publisher: American Physical Society.
- 563 15. Turiansky, M. E. *et al.* Nonrad: Computing nonradiative capture coefficients from first princi-  
564 ples. *Comput. Phys. Commun.* **267**, 108056 (2021).

- 565 16. Ivády, V. *et al.* Ab initio theory of the negatively charged boron vacancy qubit  
566 in hexagonal boron nitride. *npj Computational Materials* **6**, 1–6 (2020). URL  
567 <https://www.nature.com/articles/s41524-020-0305-x>. Number: 1 Pub-  
568 lisher: Nature Publishing Group.
- 569 17. Fröch, J. E. *et al.* Purcell Enhancement of a Cavity-Coupled Emit-  
570 ter in Hexagonal Boron Nitride. *Small* **18**, 2104805 (2022). URL  
571 <https://onlinelibrary.wiley.com/doi/abs/10.1002/sml1.202104805>.  
572 \_eprint: <https://onlinelibrary.wiley.com/doi/pdf/10.1002/sml1.202104805>.
- 573 18. Toledo, J. R. *et al.* Electron paramagnetic resonance signature of point defects in  
574 neutron-irradiated hexagonal boron nitride. *Physical Review B* **98**, 155203 (2018).  
575 URL <https://link.aps.org/doi/10.1103/PhysRevB.98.155203>. Publisher:  
576 American Physical Society.
- 577 19. Huseynov, E. M. *et al.* EPR spectroscopy of neutron irradiated nanocrystalline  
578 boron nitride (h-BN) particles. *Ceramics International* **47**, 7218–7223 (2021). URL  
579 <https://www.sciencedirect.com/science/article/pii/S0272884220333915>.
- 580 20. Miao, K. C. *et al.* Universal coherence protection in a solid-  
581 state spin qubit. *Science* **369**, 1493–1497 (2020). URL  
582 <https://science.sciencemag.org/content/369/6510/1493>.
- 583 21. Lloyd, D. *et al.* Band Gap Engineering with Ultralarge Biaxial Strains in  
584 Suspended Monolayer MoS<sub>2</sub>. *Nano Letters* **16**, 5836–5841 (2016). URL  
585 <https://doi.org/10.1021/acs.nanolett.6b02615>. Publisher: American  
586 Chemical Society.
- 587 22. Peng, Z., Chen, X., Fan, Y., Srolovitz, D. J. & Lei, D. Strain engineer-  
588 ing of 2D semiconductors and graphene: from strain fields to band-structure tuning  
589 and photonic applications. *Light: Science & Applications* **9**, 190 (2020). URL

- 590 <https://www.nature.com/articles/s41377-020-00421-5>. Number: 1 Pub-  
591 lisher: Nature Publishing Group.
- 592 23. Grosso, G. *et al.* Tunable and high-purity room temperature single-photon emission from  
593 atomic defects in hexagonal boron nitride. *Nature Communications* **8**, 705 (2017). URL  
594 <https://www.nature.com/articles/s41467-017-00810-2>. Number: 1 Pub-  
595 lisher: Nature Publishing Group.
- 596 24. Proscia, N. V. *et al.* Near-deterministic activation of room-temperature quan-  
597 tum emitters in hexagonal boron nitride. *Optica* **5**, 1128–1134 (2018). URL  
598 <https://www.osapublishing.org/optica/abstract.cfm?uri=optica-5-9-1128>.  
599 Publisher: Optical Society of America.
- 600 25. Yim, D., Yu, M., Noh, G., Lee, J. & Seo, H. Polarization and Localization of Single-Photon  
601 Emitters in Hexagonal Boron Nitride Wrinkles. *ACS Applied Materials & Interfaces* **12**,  
602 36362–36369 (2020). URL <https://doi.org/10.1021/acsami.0c09740>. Pub-  
603 lisher: American Chemical Society.
- 604 26. Mendelson, N., Doherty, M., Toth, M., Aharonovich, I. & Tran, T. T. Strain-  
605 Induced Modification of the Optical Characteristics of Quantum Emitters in  
606 Hexagonal Boron Nitride. *Advanced Materials* **32**, 1908316 (2020). URL  
607 <https://onlinelibrary.wiley.com/doi/abs/10.1002/adma.201908316>.  
608 [\\_eprint: https://onlinelibrary.wiley.com/doi/pdf/10.1002/adma.201908316](https://onlinelibrary.wiley.com/doi/pdf/10.1002/adma.201908316).
